# Supplementary material for: Impact of Dietary Supplementation of Lactic Acid Bacteria Fermented Rapeseed with or without Macroalgae on Performance and Health of Piglets Following Omission of Medicinal Zinc from Weaner Diets
Source: PubMed Central journal article supplement (PMC7023219; doi:10.3390/ani10010137), 2020-01-15
Supplement: animals-10-00137-s001.pdf [file animals-10-00137-s001.pdf]

|                              |       |       |       |       |       |       |       |       |       |       |
|------------------------------|-------|-------|-------|-------|-------|-------|-------|-------|-------|-------|
| Vitamin E 50%                | 0.03  | 0.03  | 0.03  | 0.03  | 0.03  | 0.01  | 0.01  | 0.01  | 0.01  | 0.01  |
| <sup>4</sup> Premix 0.5%     | 5.00  | 5.00  | 5.00  | 5.00  | 5.00  | 5.00  | 5.00  | 5.00  | 5.00  | 5.00  |
| Zinc oxide (78%)             | -     | 3.20  | -     | -     | -     | -     | -     | -     | -     | -     |
| Calculated nutritional value |       |       |       |       |       |       |       |       |       |       |
| Dry mass%                    | 88.5  | 88.6  | 88.6  | 88.6  | 88.7  | 87.5  | 87.5  | 87.7  | 87.6  | 87.7  |
| Metabolizable energy (MJ)    | 14.3  | 14.3  | 14.3  | 14.3  | 14.3  | 13.5  | 13.5  | 13.5  | 13.5  | 13.5  |
| Crude protein (%)            | 19.7  | 19.7  | 19.7  | 19.7  | 19.7  | 18.4  | 18.4  | 18.4  | 18.4  | 18.4  |
| Crude fat (%)                | 5.56  | 5.86  | 6.26  | 5.88  | 6.31  | 4.03  | 4.03  | 4.5   | 4.29  | 4.52  |
| Crude fiber (%)              | 2.2   | 2.18  | 2.81  | 2.52  | 2.87  | 3.11  | 3.11  | 3.77  | 3.46  | 3.83  |
| Crude ash (%)                | 5.37  | 5.81  | 5.58  | 5.5   | 5.57  | 5.69  | 5.69  | 6.05  | 5.86  | 6.05  |
| Starch (g)                   | 417.4 | 411.3 | 382.4 | 398.6 | 380.4 | 425.6 | 425.6 | 391.1 | 406.2 | 389.5 |
| Lactose (g)                  | 36.5  | 36.5  | 36.5  | 36.5  | 36.5  | -     | -     | -     | -     | -     |
| Calcium (%)                  | 0.83  | 0.85  | 0.86  | 0.84  | 0.86  | 0.82  | 0.82  | 0.82  | 0.82  | 0.82  |
| Total phosphorus (%)         | 0.65  | 0.68  | 0.65  | 0.65  | 0.65  | 0.58  | 0.58  | 0.58  | 0.58  | 0.58  |
| Dig. phosphorus (%)          | 0.59  | 0.63  | 0.58  | 0.59  | 0.58  | 0.51  | 0.51  | 0.50  | 0.51  | 0.50  |
| Sodium (%)                   | 0.23  | 0.23  | 0.23  | 0.23  | 0.23  | 0.22  | 0.22  | 0.22  | 0.22  | 0.22  |
| Chlorides (%)                | 0.57  | 0.57  | 0.56  | 0.54  | 0.56  | 0.51  | 0.51  | 0.51  | 0.49  | 0.50  |
| Potassium (%)                | 6.65  | 0.65  | 0.68  | 0.66  | 0.68  | 0.67  | 0.70  | 0.73  | 0.69  | 0.73  |
| Lysine (%)                   | 1.46  | 1.46  | 1.46  | 1.46  | 1.46  | 1.28  | 1.28  | 1.28  | 1.28  | 1.28  |
| Methionine (%)               | 0.45  | 0.45  | 0.45  | 0.45  | 0.45  | 0.41  | 0.41  | 0.41  | 0.41  | 0.41  |
| Met + Cys (%)                | 0.77  | 0.77  | 0.80  | 0.78  | 0.80  | 0.72  | 0.72  | 0.75  | 0.73  | 0.75  |
| Threonine (%)                | 0.92  | 0.92  | 0.92  | 0.92  | 0.92  | 0.81  | 0.81  | 0.81  | 0.81  | 0.81  |
| Tryptophan (%)               | 0.31  | 0.31  | 0.31  | 0.31  | 0.31  | 0.26  | 0.26  | 0.26  | 0.26  | 0.26  |
| Valine (%)                   | 1.03  | 1.03  | 1.03  | 1.03  | 1.03  | 0.90  | 0.90  | 0.90  | 0.90  | 0.90  |
| Isoleucine (%)               | 0.78  | 0.79  | 0.78  | 0.78  | 0.78  | 0.70  | 0.70  | 0.69  | 0.69  | 0.69  |

<sup>1</sup>Medicinal zinc oxide (78%) was included in only pre-starter PC diet at 2500 ppm (2.5 g/kg) and the piglets from that group followed throughout the entire experimental period.

<sup>2</sup>Quantum® Blue – enhanced *E. coli* phytase optimized to breakdown phytate in feed (ABvista).

<sup>3</sup>Axtra® XB 201. Mixture of beta-glucanase and beta-xylanase (Danisco Animal Nutrition – Dupont).

<sup>4</sup>Mineral-vitamin premix in mg/kg of diet for both pre-starter and starter diets: vitamin A – 13,000 IU; vitamin D<sub>3</sub>-2000 IU; vitamin E – 165 mg; vitamin B1 – 2.5 mg; vitamin B2 – 7.0 mg; vitamin B6 – 4.0 mg; vitamin B12 – 0.05 mg; vitamin C – 100 mg; vitamin K – 3 mg; biotin – 0.2 mg; niacin – 35 mg; folic acid – 1.5 mg; pantothenic acid – 21.7 mg; iron – 180 mg; zinc – 150 mg; manganese – 55 mg; selenium – 0.40 mg; iodine – 0.60 mg.

Table S2. Effect of pre-fermented dietary additives (rapeseed meal with or without macroalgae) on weights of gut segments and accessory digestive organs of weaner piglets

|                  | Female            |                    |                    |                    |                    | Male              |                    |                    |                    |                   | SEM  | P-value |       |          |       |
|------------------|-------------------|--------------------|--------------------|--------------------|--------------------|-------------------|--------------------|--------------------|--------------------|-------------------|------|---------|-------|----------|-------|
|                  | NC                | PC                 | FRM                | FRMA               | FRMAS              | NC                | PC                 | FRM                | FRMA               | FRMAS             |      | TG      | Sex   | TG x Sex | Week  |
| STTW             | 113               | 109.8              | 108.2              | 103.7              | 95.7               | 103.4             | 100.3              | 98.6               | 94.1               | 86.1              | 7.8  | 0.469   | 0.197 | NS       | 0.035 |
| SITW             | 479               | 468                | 519                | 499                | 472                | 502               | 491                | 543                | 522                | 495               | 31.8 | 0.514   | 0.312 | NS       | 0.503 |
| HGTW             | 287               | 279                | 305                | 271                | 270                | 260               | 252                | 278                | 245                | 243               | 22.3 | 0.802   | 0.259 | NS       | 0.003 |
| LVW              | 324               | 347                | 332                | 305                | 317                | 308               | 330                | 316                | 289                | 300               | 18.4 | 0.442   | 0.275 | NS       | 0.692 |
| PNW <sup>1</sup> | 29.9 <sup>a</sup> | 28.3 <sup>ab</sup> | 21.6 <sup>ab</sup> | 23.1 <sup>ab</sup> | 21.6 <sup>ab</sup> | 19.7 <sup>b</sup> | 22.1 <sup>ab</sup> | 28.4 <sup>ab</sup> | 27.1 <sup>ab</sup> | 18.0 <sup>b</sup> | 3.32 | 0.214   | 0.221 | 0.017    | 0.008 |
| SPW              | 26.9              | 31.7               | 34.2               | 30.1               | 31.7               | 24.2              | 28.9               | 31.4               | 27.3               | 28.9              | 3.49 | 0.483   | 0.373 | NS       | 0.066 |

<sup>1</sup>Treatment and sex interaction (TG x Sex) for PNW (P=0.017)

TG = Treatment group; NC=Negative control with no dietary supplements; PC=positive control with 2500 ppm *in-feed* ZnO in the pre-starter diet; FRM=Pre-fermented rapeseed meal at 10% of dietary DM inclusion; FRMA=Co-pre-fermented rapeseed meal and *Ascophyllum nodosum* at 5% of dietary DM inclusion; FRMAS=Co-pre-fermented rapeseed meal, *A. nodosum* and *Saccharina latissima* at 10.5% of dietary DM inclusion. STTW=stomach tissue weight; SITW=Small intestine tissue weight; HGTW= hindgut tissue weight; LVW= liver weight, PNW=pancreas weight; SPW= spleen weight. Week refers to two different experimental weeks, where batches of piglets were sacrificed 21 days after weaning (5 piglets each of the two week).

Table S3. Effect of pre-fermented dietary additives (rapeseed meal with or without) macroalgae on blood chemistry of weaner piglets fed different diets after weaning; NC=Negative control with no dietary supplements; PC=positive control with 2500 ppm *in-feed* ZnO in the pre-starter diet; FRM=Pre-fermented rapeseed meal at 10% of dietary DM inclusion; FRMA=Co-pre-fermented rapeseed meal and *Ascophyllum nodosum* at 5% of dietary DM inclusion; FRMAS=Co-pre-fermented rapeseed meal, *A. nodosum* and *Saccharina latissima* at 10.5% of dietary DM inclusion.

| Parameters                       | Treatments         |                     |                    |                     |                    | SEM   | Sex                |                    |       | P-value |       |                |
|----------------------------------|--------------------|---------------------|--------------------|---------------------|--------------------|-------|--------------------|--------------------|-------|---------|-------|----------------|
|                                  | NC                 | PC                  | FRM                | FRMA                | FRMAS              |       | Female             | Male               | SEM   | TG      | Sex   | Insertion week |
| <b>Erythrocyte indices</b>       |                    |                     |                    |                     |                    |       |                    |                    |       |         |       |                |
| RBC (10 <sup>10</sup> /L)        | 612 <sup>a</sup>   | 574 <sup>ab</sup>   | 596 <sup>ab</sup>  | 548 <sup>b</sup>    | 548 <sup>b</sup>   | 14.5  | 593 <sup>a</sup>   | 559 <sup>b</sup>   | 9.24  | 0.019   | 0.022 | 0.112          |
| Hb (g/dL)                        | 10.06              | 9.67                | 9.67               | 9.31                | 9.44               | 0.250 | 9.94 <sup>a</sup>  | 9.32 <sup>b</sup>  | 0.159 | 0.307   | 0.013 | 0.202          |
| Ht (%)                           | 33.4               | 32.6                | 32.2               | 30.1                | 31.2               | 0.98  | 33.0 <sup>a</sup>  | 30.8 <sup>b</sup>  | 0.62  | 0.177   | 0.015 | 0.886          |
| MCV, fL                          | 54.6               | 57.0                | 54.0               | 54.8                | 57.1               | 1.27  | 55.9               | 55.1               | 0.81  | 0.219   | 0.401 | 0.138          |
| MCH, pg/cell                     | 16.5               | 16.9                | 16.2               | 17.0                | 17.2               | 0.318 | 16.8               | 16.7               | 0.202 | 0.136   | 0.575 | 0.709          |
| MCHC, g/dL                       | 3.41               | 3.39                | 3.41               | 3.44                | 3.41               | 0.015 | 3.41               | 3.41               | 0.010 | 0.252   | 0.632 | 0.073          |
| RDW-CV                           | 24                 | 24.4                | 22.9               | 22.1                | 24.3               | 0.84  | 23.2               | 23.9               | 0.536 | 0.285   | 0.466 | 0.022          |
| ESR, mm/h                        | 1.08               | 1.48                | 1.93               | 1.44                | 2.02               | 0.426 | 1.42               | 1.76               | 0.276 | 0.509   | 0.385 | 0.922          |
| <b>Leucocyte indices</b>         |                    |                     |                    |                     |                    |       |                    |                    |       |         |       |                |
| Platelets (10 <sup>10</sup> /L)  | 37.4               | 41.1                | 32.0               | 33.7                | 29.2               | 3.48  | 36.3               | 33.1               | 2.21  | 0.147   | 0.440 | 0.064          |
| Leucocytes (10 <sup>9</sup> /L)  | 36.4 <sup>a</sup>  | 28.9 <sup>ab</sup>  | 29.1 <sup>ab</sup> | 25.2 <sup>b</sup>   | 21.6 <sup>b</sup>  | 2.31  | 29.4               | 27.1               | 1.47  | 0.001   | 0.111 | 0.000          |
| Neutrophils (%)                  | 55.1               | 51.3                | 60.5               | 50.1                | 48.9               | 4.21  | 54.8               | 51.6               | 2.67  | 0.378   | 0.686 | 0.002          |
| Neutrophils (10 <sup>9</sup> /L) | 19.3 <sup>a</sup>  | 14.9 <sup>ab</sup>  | 17.6 <sup>ab</sup> | 13.1 <sup>ab</sup>  | 10.5 <sup>b</sup>  | 1.94  | 16.2               | 13.9               | 1.23  | 0.03    | 0.185 | 0.675          |
| Lymphocytes (%)                  | 40.7               | 44.2                | 36.6               | 44.5                | 46.5               | 3.72  | 41.1               | 43.9               | 2.36  | 0.447   | 0.727 | 0.000          |
| Lymphocytes (10 <sup>9</sup> /L) | 15.7               | 12.9                | 10.7               | 11.0                | 10.2               | 1.58  | 12.1               | 12.1               | 1.00  | 0.089   | 0.474 | 0.000          |
| Monocytes (%)                    | 3.37               | 3.52                | 2.54               | 4.27                | 3.43               | 0.78  | 3.18               | 3.67               | 0.49  | 0.678   | 0.412 | 0.290          |
| Monocytes (10 <sup>9</sup> /L)   | 1.16               | 8.97                | 8.31               | 1.67                | 6.58               | 3.67  | 1.18               | 9.05               | 0.23  | 0.307   | 0.442 | 0.484          |
| Eosinophils (%)                  | 0.169 <sup>a</sup> | 0.297 <sup>ab</sup> | 0.183 <sup>a</sup> | 0.494 <sup>ab</sup> | 0.575 <sup>b</sup> | 0.095 | 0.431 <sup>a</sup> | 0.256 <sup>b</sup> | 0.061 | 0.003   | 0.05  | 0.938          |
| Eosinophils (10 <sup>9</sup> /L) | 0.074              | 0.087               | 0.058              | 0.012               | 0.016              | 0.029 | 0.124              | 0.077              | 0.019 | 0.042   | 0.078 | 0.919          |

|                                  |       |       |       |       |       |       |       |       |       |       |       |       |
|----------------------------------|-------|-------|-------|-------|-------|-------|-------|-------|-------|-------|-------|-------|
| Basophils (%)                    | 0.540 | 0.570 | 0.164 | 0.320 | 0.276 | 0.140 | 0.310 | 0.438 | 0.089 | 0.204 | 0.437 | 0.085 |
| <b>Blood biochemistry</b>        |       |       |       |       |       |       |       |       |       |       |       |       |
| ALAT (U/L) <sup>1</sup>          | 3.95  | 4.26  | 3.87  | 3.94  | 4.11  | 0.154 | 4.02  | 4.03  | 0.098 | 0.376 | 0.682 | 0.000 |
| ASAT (U/L) <sup>1</sup>          | 4.50  | 4.67  | 4.52  | 4.52  | 4.94  | 0.193 | 4.55  | 4.71  | 0.125 | 0.566 | 0.606 | 0.006 |
| BUN (mg/dL) <sup>1</sup>         | 2.94  | 2.69  | 2.39  | 2.35  | 2.52  | 0.158 | 2.48  | 2.68  | 0.100 | 0.072 | 0.097 | 0.041 |
| LDH (U/L) <sup>1</sup>           | 6.88  | 7.08  | 6.97  | 7.02  | 7.26  | 0.156 | 7.01  | 7.07  | 0.099 | 0.549 | 0.891 | 0.001 |
| Uric acid (mg/dL) <sup>1</sup>   | 0.240 | 0.290 | 0.335 | 0.350 | 0.595 | 0.123 | 0.425 | 0.299 | 0.078 | 0.213 | 1.49  | 0.007 |
| TP (g/dL)                        | 4.41  | 4.67  | 4.75  | 4.65  | 4.69  | 0.243 | 4.59  | 4.68  | 0.154 | 0.868 | 0.527 | 0.055 |
| Glucose (mg/dL)                  | 102.1 | 97.6  | 95.2  | 92.5  | 98.6  | 6.72  | 101.0 | 93.4  | 4.26  | 0.819 | 0.324 | 0.054 |
| Phosphorous (mg/dL)              | 9.65  | 9.83  | 9.28  | 9.08  | 10.24 | 0.651 | 9.65  | 9.58  | 0.413 | 0.719 | 0.622 | 0.005 |
| TCH (mg/dL)                      | 73.0  | 72.1  | 66.8  | 73.1  | 78.7  | 5.95  | 73.5  | 72.0  | 3.78  | 0.682 | 0.505 | 0.003 |
| TG (mg/dL) <sup>1</sup>          | 3.69  | 3.72  | 3.67  | 3.70  | 3.93  | 0.145 | 3.82  | 3.67  | 0.092 | 0.543 | 0.211 | 0.261 |
| LDL (mg/dL)                      | 39.9  | 38.0  | 35.1  | 38.5  | 36.4  | 3.58  | 35.9  | 39.3  | 2.27  | 0.899 | 0.289 | 0.975 |
| HDL (mg/dL)                      | 34.0  | 31.5  | 28.2  | 30.5  | 30.2  | 3.11  | 31.1  | 30.7  | 1.98  | 0.746 | 0.819 | 0.494 |
| <b>Humoral defense molecules</b> |       |       |       |       |       |       |       |       |       |       |       |       |
| IgG (µg/mL)                      | 2626  | 2505  | 2293  | 2411  | 2146  | 135   | 2369  | 2423  | 84.9  | 0.090 | 0.554 | 0.000 |
| Lysozyme (pmol/mL) <sup>1</sup>  | 5.05  | 4.96  | 4.86  | 4.93  | 4.89  | 0.109 | 4.93  | 4.95  | 0.069 | 0.742 | 0.387 | 0.000 |

RBC = red blood cells, Hb = haemoglobin, Ht = hematocrit, MCV = mean corpuscular volume, MCH = mean corpuscular hemoglobin, MCHC = mean corpuscular hemoglobin concentration, RDW-CV = red blood cell distribution width, ESR = erythrocyte sedimentation rate, WBC = white blood cells, ALAT=alanine-aminotransferase; ASAT= aspartate aminotransaminase, BUN = blood urea nitrogen, LDH=lactate dehydrogenase, TP = total protein, TCH = total cholesterol, TG = total triglycerides, LDL=low density lipoprotein, HDL=high density lipoprotein; IgG = Immunoglobulin G.  
<sup>1</sup>log transformed.

Supplementary Figure

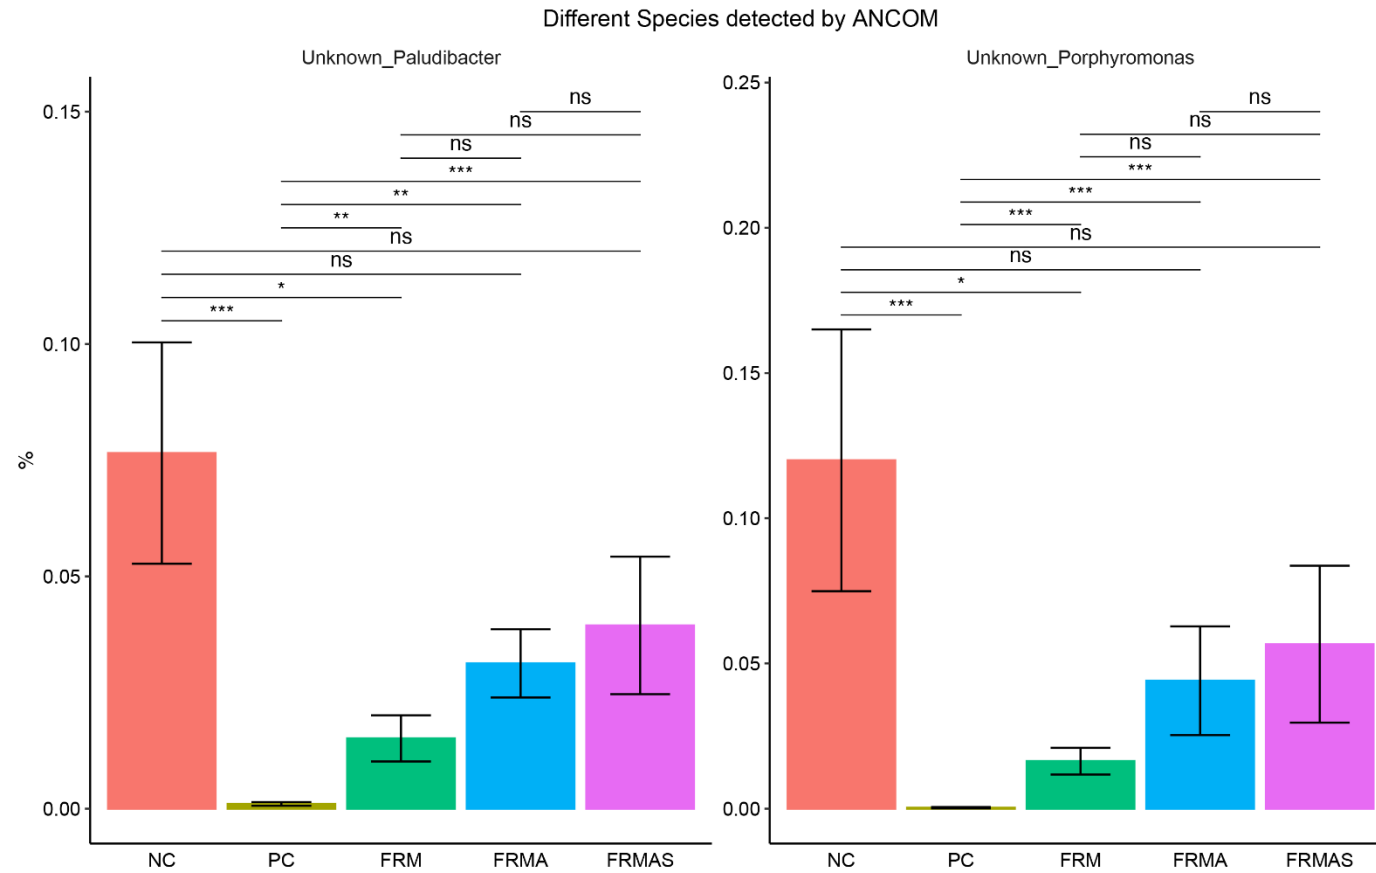

Figure S1: Relative abundance of colon microbiota species from piglets sacrificed 21 days after weaning that were found to be significantly different between dietary supplementation as determined by ANCOM analysis. NC=Negative control with no dietary supplements; PC=positive control with 2500 ppm *in-feed* ZnO in the pre-starter diet; FRM=Pre-fermented rapeseed meal at 10% of dietary DM inclusion; FRMA=Co-pre-fermented rapeseed meal and *Ascophyllum nodosum* at 5% of dietary DM inclusion; FRMAS=Co-pre-fermented rapeseed meal, *A. nodosum* and *Saccharina latissima* at 10.5% of dietary DM inclusion.
